# Supplementary material for: Ductal adenocarcinoma of the prostate: A systematic review and meta‐analysis of incidence, presentation, prognosis, and management
Source: PubMed Central journal article supplement (PMC8988764; doi:10.1002/bco2.60), 2021-01-05
Supplement: BCO2-2-13-s002.pdf [file BCO2-2-13-s002.pdf]

**Author(s):**  
**Question:** DAC compared to AAC for PCa  
**Setting:**  
**Bibliography:**

| Certainty assessment      |              |              |               |              |             |                      | N <sub>o</sub> of patients |     | Effect            |                   | Certainty | Importance |
|---------------------------|--------------|--------------|---------------|--------------|-------------|----------------------|----------------------------|-----|-------------------|-------------------|-----------|------------|
| N <sub>o</sub> of studies | Study design | Risk of bias | Inconsistency | Indirectness | Imprecision | Other considerations | DAC                        | AAC | Relative (95% CI) | Absolute (95% CI) |           |            |

**BCR (follow up: mean 5 years)**

|   |                       |                      |             |             |                             |                                                                          |              |               |                                   |                                                            |                  |          |
|---|-----------------------|----------------------|-------------|-------------|-----------------------------|--------------------------------------------------------------------------|--------------|---------------|-----------------------------------|------------------------------------------------------------|------------------|----------|
| 1 | observational studies | serious <sup>a</sup> | not serious | not serious | very serious <sup>b,c</sup> | publication bias strongly suspected very strong association <sup>d</sup> | 8/13 (61.5%) | 11/97 (11.3%) | <b>RR 5.42</b><br>(2.69 to 10.97) | <b>501 more per 1,000</b><br>(from 192 more to 1,000 more) | ⊕○○○<br>VERY LOW | CRITICAL |
|---|-----------------------|----------------------|-------------|-------------|-----------------------------|--------------------------------------------------------------------------|--------------|---------------|-----------------------------------|------------------------------------------------------------|------------------|----------|

**Overall survival (follow up: mean 5 years; assessed with: death)**

|   |                       |                      |             |             |             |      |                   |                         |                                  |                                                             |                  |          |
|---|-----------------------|----------------------|-------------|-------------|-------------|------|-------------------|-------------------------|----------------------------------|-------------------------------------------------------------|------------------|----------|
| 3 | observational studies | serious <sup>e</sup> | not serious | not serious | not serious | none | 1326/1776 (74.7%) | 1049013/1193901 (87.9%) | <b>RR 0.83</b><br>(0.81 to 0.85) | <b>149 fewer per 1,000</b><br>(from 167 fewer to 132 fewer) | ⊕○○○<br>VERY LOW | CRITICAL |
|---|-----------------------|----------------------|-------------|-------------|-------------|------|-------------------|-------------------------|----------------------------------|-------------------------------------------------------------|------------------|----------|

**Cancer specific survival (follow up: mean 5 years; assessed with: death)**

|   |                       |             |             |             |             |      |                 |                       |                                  |                                                             |             |          |
|---|-----------------------|-------------|-------------|-------------|-------------|------|-----------------|-----------------------|----------------------------------|-------------------------------------------------------------|-------------|----------|
| 3 | observational studies | not serious | not serious | not serious | not serious | none | 765/959 (79.8%) | 427650/445568 (96.0%) | <b>RR 0.85</b><br>(0.82 to 0.88) | <b>144 fewer per 1,000</b><br>(from 173 fewer to 115 fewer) | ⊕⊕○○<br>LOW | CRITICAL |
|---|-----------------------|-------------|-------------|-------------|-------------|------|-----------------|-----------------------|----------------------------------|-------------------------------------------------------------|-------------|----------|

**Positive T3 stage**

|   |                       |             |             |             |             |                    |                  |                     |                                  |                                                       |                  |          |
|---|-----------------------|-------------|-------------|-------------|-------------|--------------------|------------------|---------------------|----------------------------------|-------------------------------------------------------|------------------|----------|
| 5 | observational studies | not serious | not serious | not serious | not serious | strong association | 260/1170 (22.2%) | 60184/675978 (8.9%) | <b>RR 1.71</b><br>(1.53 to 1.91) | <b>63 more per 1,000</b><br>(from 47 more to 81 more) | ⊕⊕⊕○<br>MODERATE | CRITICAL |
|---|-----------------------|-------------|-------------|-------------|-------------|--------------------|------------------|---------------------|----------------------------------|-------------------------------------------------------|------------------|----------|

**Positive N status**

|   |                       |                      |             |             |                           |      |                 |                    |                                  |                                                     |                  |           |
|---|-----------------------|----------------------|-------------|-------------|---------------------------|------|-----------------|--------------------|----------------------------------|-----------------------------------------------------|------------------|-----------|
| 3 | observational studies | serious <sup>e</sup> | not serious | not serious | very serious <sup>f</sup> | none | 350/897 (39.0%) | 5907/279637 (2.1%) | <b>RR 1.04</b><br>(0.97 to 1.11) | <b>1 more per 1,000</b><br>(from 1 fewer to 2 more) | ⊕○○○<br>VERY LOW | IMPORTANT |
|---|-----------------------|----------------------|-------------|-------------|---------------------------|------|-----------------|--------------------|----------------------------------|-----------------------------------------------------|------------------|-----------|

**Positive M status**

|   |                       |             |             |             |             |                         |                     |                        |                                  |                                                         |              |          |
|---|-----------------------|-------------|-------------|-------------|-------------|-------------------------|---------------------|------------------------|----------------------------------|---------------------------------------------------------|--------------|----------|
| 3 | observational studies | not serious | not serious | not serious | not serious | very strong association | 138/1156<br>(11.9%) | 23769/688780<br>(3.5%) | <b>RR 4.62</b><br>(3.84 to 5.56) | <b>125 more per 1,000</b><br>(from 98 more to 157 more) | ⊕⊕⊕⊕<br>HIGH | CRITICAL |
|---|-----------------------|-------------|-------------|-------------|-------------|-------------------------|---------------------|------------------------|----------------------------------|---------------------------------------------------------|--------------|----------|

**CI:** Confidence interval; **RR:** Risk ratio

**Explanations**

- a. serious risk of confounder bias
- b. small sample size
- c. wide confidence interval
- d. small study showing large effect
- e. serious risk of bias in selection of the reported result in one study
- f. RR is 1.04, confidence interval spans 1
